# Supplementary material
Source: MDPI journal article supplement (https://www.mdpi.com/2410-3888/8/12/611)
Supplement: s1 [file s1 › fishes-2716569-supplementary.pdf]

## Supplementary materials

**Table S1.** Scan parameters for T1-weighted images of *H. portusjacksoni*. TR: repetition time; TE: echo time; NEX: number of excitations (or averages).

| ID code | TR (ms) | TE (ms) | Flip angle (°) | NEX | Resolution (μm) | Scan time   |
|---------|---------|---------|----------------|-----|-----------------|-------------|
| 02A     | 60      | 8.76    | 63             | 4   | 70              | 15h, 12 min |
| 07A     | 60      | 7.30    | 65             | 3   | 90              | 5h, 39 min  |
| 10A     | 60      | 8.68    | 66             | 5   | 75              | 14h, 30 min |
| 03E     | 60      | 8.60    | 68             | 5   | 60              | 14h, 19 min |
| 07E     | 60      | 7.00    | 66             | 3   | 90              | 5h, 20 min  |
| 09E     | 60      | 7.24    | 68             | 3   | 80              | 5h, 41 min  |

**Table S2.** Results of the best-fit model for each PNS region. Two different candidate models of peripheral nervous system volume were tested, using the variables of region volume ~ body weight (model 1) and  $\log_{10}$  region volume ~  $\log_{10}$  body weight (model 2). The best-fit model for each PNS region, as determined by AICc score, is shown in bold. AICc, corrected Akaike information criterion; OR, olfactory rosette.

|                                                     | Eyes     | OR       |
|-----------------------------------------------------|----------|----------|
| region volume ~ body weight                         |          |          |
| AICc                                                | 79.1     | 78.6     |
| $\Delta$ AICc                                       | 89.64    | 79.14    |
| Weight                                              | 0        | 0        |
| $\log_{10}$ region volume ~ $\log_{10}$ body weight |          |          |
| AICc                                                | -10.6    | -0.6     |
| $\Delta$ AICc                                       | 0        | 0        |
| Weight                                              | <b>1</b> | <b>1</b> |

**Table S3.** Results of the best-fit model for the total brain. Two different candidate models of total brain mass were tested, using the variables of region volume ~ body weight (model 1) and  $\log_{10}$  region volume ~  $\log_{10}$  body weight (model 2). The best-fit model for total brain weight, as determined by AICc score, is shown in bold. AICc, corrected Akaike information criterion.

|                                                    | Total brain |
|----------------------------------------------------|-------------|
| brain weight ~ body weight                         |             |
| AICc                                               | -66.4       |
| $\Delta$ AICc                                      | 27          |
| Weight                                             | 0           |
| $\log_{10}$ brain weight ~ $\log_{10}$ body weight |             |
| AICc                                               | -39.4       |
| $\Delta$ AICc                                      | 0           |
| Weight                                             | <b>1</b>    |

**Table S4.** Results of the best-fit model for each brain region. Two different candidate models of brain region mass were tested, using the variables of brain region weight ~ total brain weight (model 1) and  $\log_{10}$  brain region weight ~  $\log_{10}$  total brain weight (model 2). The best-fit model for each region, as determined by AICc score, is shown in bold. AICc, corrected Akaike information criterion; CER, cerebellum; DI, diencephalon; MED, medulla oblongata; OB, olfactory bulb; OT, optic tectum; TE, telencephalon; TEG, tegmentum.

|                                                                  | OB       | TE          | DI       | OT       | TEG      | CER      | MED      |
|------------------------------------------------------------------|----------|-------------|----------|----------|----------|----------|----------|
| brain region weight ~ total brain weight                         |          |             |          |          |          |          |          |
| AICc                                                             | -117.6   | -119.3      | -159.7   | -159.5   | -143.2   | -159.8   | -133.8   |
| $\Delta$ AICc                                                    | 0        | 0           | 0        | 0        | 0        | 0        | 0        |
| Weight                                                           | <b>1</b> | <b>0.90</b> | <b>1</b> | <b>1</b> | <b>1</b> | <b>1</b> | <b>1</b> |
| $\log_{10}$ brain region weight ~ $\log_{10}$ total brain weight |          |             |          |          |          |          |          |
| AICc                                                             | -35.9    | -114.9      | -83.3    | -55.4    | -36.2    | -94.5    | -87.3    |
| $\Delta$ AICc                                                    | 81.66    | 4.44        | 76.43    | 104.05   | 106.95   | 65.25    | 46.49    |
| Weight                                                           | 0        | 0.10        | 0        | 0        | 0        | 0        | 0        |
